# Supplementary material for: Planktonic foraminifera Iodine/Calcium ratio: is it a proxy for dissolved oxygen in the ocean?
Source: Copernicus journal article supplement (doi:10.5194/egusphere-2026-622), 2026-02-12
Supplement: Supplementary file [file egusphere-2026-622-AC1-supplement.pdf]

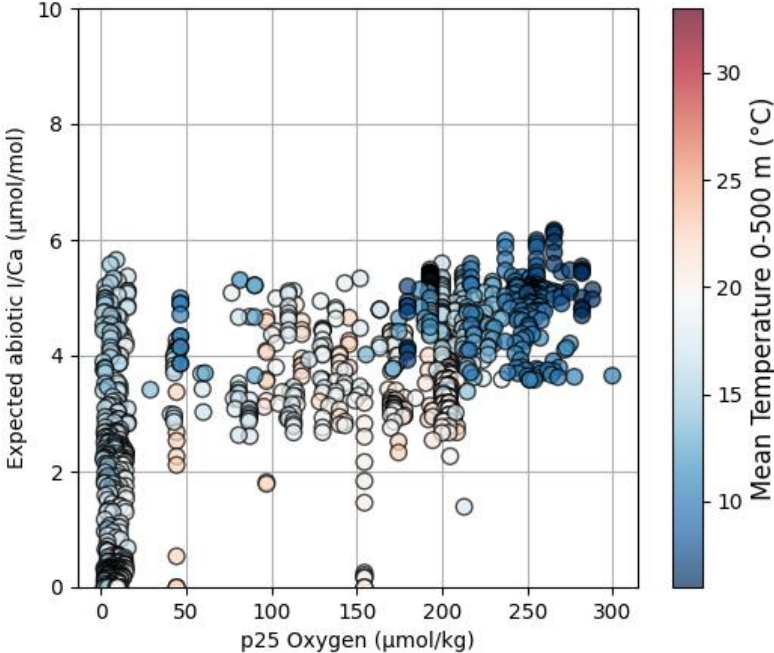

Fig. AC1.S1: Expected abiotic I/Ca for different p25[O<sub>2</sub>]. The I/Ca takes into account the mean temperature at site by considering linear interpolation between temperature dependant iodine incorporation in calcite (Zhou et al. 2014).

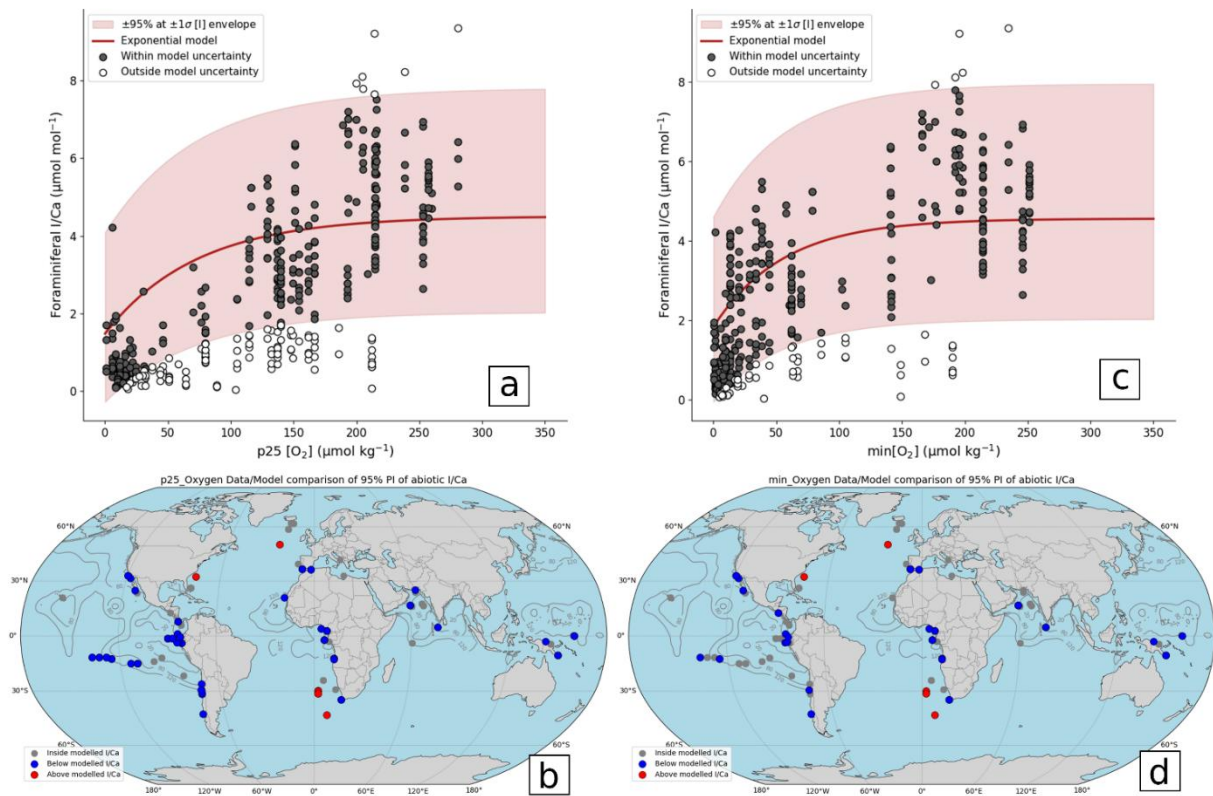

Fig. AC1.S2: Foraminiferal I/Ca ratio ( $\mu\text{mol/mol}$ ) as a function of p25 $[\text{O}_2]$  (a) and minimum  $[\text{O}_2]$  (c). Red curve is the exponential model based on iodate proportion (Fig. 3a) and inorganic iodine incorporation at 19°C (Zhou et al. 2014). The red shaded area corresponds to the 95% prediction interval of the iodate proportion with total inorganic iodine concentration at  $\pm 1\sigma$  (Fig. 3c). Points that fall into the model uncertainty are in grey. Others are plotted in white. Maps represent data above (red) and below (blue) 95% prediction interval of modelled abiotic I/Ca for p25 (b) and minimum (d)  $[\text{O}_2]$ . Grey lines represent the presence of low oxygen concentration (20, 80 and 120  $\mu\text{mol/kg}$ ) in 0–500 m.
